# Supplementary material for: Doctor Retention: A Cross-sectional Study of How Ireland Has Been Losing the Battle
Source: PubMed Central journal article supplement (PMC9056149; doi:10.34172/ijhpm.2020.54), 2020-04-22
Supplement: ijhpm-10-299-s001.pdf [file ijhpm-10-299-s001.pdf]

## Supplementary file 1

**Table S1.** Timing of non-consultant hospital doctors' migration plans

| Variable               | Timing | Go before specialist training **<br>No. (%) | Go during specialist training<br>No. (%) | Go after specialist training<br>No. (%) | TOTAL<br>No. (100%) | P value |
|------------------------|--------|---------------------------------------------|------------------------------------------|-----------------------------------------|---------------------|---------|
| <b>TOTAL</b>           |        | 122 (21%)                                   | 122 (21%)                                | 338 (58%)                               | 582                 | <0.001  |
| <b>Nationality</b>     |        |                                             |                                          |                                         |                     |         |
| Irish                  |        | 54 (14%)                                    | 88 (22%)                                 | 256 (64%)                               | 398                 |         |
| Other EU               |        | 2 (10%)                                     | 10 (48%)                                 | 9 (43%)                                 | 21                  |         |
| Non-EU                 |        | 47 (45%)                                    | 14 (13%)                                 | 44 (42%)                                | 105                 | <0.001* |
| <b>Age:</b>            |        |                                             |                                          |                                         |                     |         |
| < 30 years             |        | 64 (27%)                                    | 61 (26%)                                 | 111 (47%)                               | 236                 |         |
| ≥ 30 < 35              |        | 33 (15%)                                    | 38 (18%)                                 | 145 (67%)                               | 216                 |         |
| ≥ 35 < 40              |        | 5 (9%)                                      | 11 (20%)                                 | 39 (71%)                                | 55                  |         |
| ≥ 40                   |        | 4 (19%)                                     | 2 (10%)                                  | 15 (71%)                                | 21                  | <0.001* |
| <b>Gender</b>          |        |                                             |                                          |                                         |                     |         |
| Male                   |        | 55 (19%)                                    | 62 (22%)                                 | 167 (59%)                               | 284                 |         |
| Female                 |        | 57 (22%)                                    | 49 (19%)                                 | 153 (59%)                               | 259                 | 0.6     |
| <b>Marital status</b>  |        |                                             |                                          |                                         |                     |         |
| Married/co-habiting    |        | 49 (17%)                                    | 55 (20%)                                 | 177 (63%)                               | 281                 |         |
| Single                 |        | 61 (23%)                                    | 59 (23%)                                 | 140 (54%)                               | 260                 | 0.08    |
| <b>Entry route</b>     |        |                                             |                                          |                                         |                     |         |
| DEM                    |        | 51 (16%)                                    | 74 (23%)                                 | 203 (62%)                               | 328                 |         |
| GEM                    |        | 16 (16%)                                    | 16 (16%)                                 | 68 (68%)                                | 100                 |         |
| Not applicable         |        | 27 (29%)                                    | 18 (19%)                                 | 48 (52%)                                | 93                  | 0.02    |
| <b>Training status</b> |        |                                             |                                          |                                         |                     |         |
| Trainee                |        | 36 (9%)                                     | 88 (21%)                                 | 286 (70%)                               | 410                 |         |
| Non-trainee            |        | 86 (50%)                                    | 34 (20%)                                 | 52 (30%)                                | 172                 | <0.001  |
| <b>Training level</b>  |        |                                             |                                          |                                         |                     |         |
| BST                    |        | 34 (22%)                                    | 49 (31%)                                 | 75 (47%)                                | 158                 |         |
| HST                    |        | 0 (0%)                                      | 33 (20%)                                 | 133 (80%)                               | 166                 |         |
| Run through            |        | 2 (2%)                                      | 6 (7%)                                   | 78 (91%)                                | 86                  | <0.001  |
| <b>Specialty</b>       |        |                                             |                                          |                                         |                     |         |
| GP                     |        | 1 (4%)                                      | 1 (4%)                                   | 26 (93%)                                | 28                  |         |
| Surgery                |        | 27 (20%)                                    | 22 (16%)                                 | 87 (64%)                                | 136                 |         |
| Medicine               |        | 84 (29%)                                    | 77 (27%)                                 | 129 (44%)                               | 290                 |         |
| Anaesthesia            |        | 3 (4%)                                      | 8 (10%)                                  | 66 (86%)                                | 77                  |         |
| Psychiatry             |        | 7 (14%)                                     | 14 (28%)                                 | 29 (58%)                                | 50                  | <0.001  |

Abbreviations: DEM, direct entry medicine; GEM, graduate entry medicine; BST, Basic Specialist Training; HST, Higher Specialist Training; EU, European Union; GP, general practitioner.

\* Fisher test used as chi square approximation is not appropriate.

For the reported p values the null hypothesis is  $H_0$ : the timing of emigration is independent of the variable categorisations/levels for each variable of interest.

**Table S2.** Associations of demographic and training characteristics with preferred destination countries

| Destination Country    | UK        | Australia | Canada    | USA      | NZ       | Country Other | TOTAL | P value * |
|------------------------|-----------|-----------|-----------|----------|----------|---------------|-------|-----------|
| Variable               | No. (%)   | No. (%)   | No. (%)   | No. (%)  | No. (%)  | No. (%)       |       |           |
| <b>TOTAL</b>           | 154 (27%) | 131 (23%) | 125 (22%) | 54 (9%)  | 44 (8%)  | 64 (11%)      | 572   | <0.001    |
| <b>Nationality</b>     |           |           |           |          |          |               |       |           |
| Irish                  | 87 (22%)  | 102 (26%) | 95 (24%)  | 44 (11%) | 35 (9%)  | 26 (7%)       | 389   |           |
| Other EU               | 7 (33%)   | 2 (10%)   | 6 (29%)   | 0 (0%)   | 1 (5%)   | 5 (24%)       | 21    |           |
| Non EU                 | 44 (42%)  | 10 (10%)  | 10 (10%)  | 6 (6%)   | 6 (6%)   | 28 (27%)      | 124   | <0.001**  |
| <b>Age:</b>            |           |           |           |          |          |               |       |           |
| < 30 years             | 53 (23%)  | 68 (30%)  | 50 (22%)  | 22 (10%) | 21 (9%)  | 14 (6%)       | 228   |           |
| ≥ 30 < 35              | 65 (30%)  | 41 (19%)  | 53 (25%)  | 18 (8%)  | 9 (4%)   | 29 (13%)      | 215   |           |
| ≥ 35 < 40              | 15 (26%)  | 7 (12%)   | 7 (12%)   | 8 (14%)  | 10 (18%) | 10 (18%)      | 57    |           |
| ≥ 40                   | 6 (27%)   | 5 (23%)   | 2 (9%)    | 1 (5%)   | 1 (5%)   | 7 (32%)       | 22    | <0.001**  |
| <b>Gender</b>          |           |           |           |          |          |               |       |           |
| Female                 | 76 (27%)  | 64 (23%)  | 74 (27%)  | 24 (9%)  | 21 (8%)  | 18 (6%)       | 277   |           |
| Male                   | 68 (26%)  | 56 (22%)  | 43 (17%)  | 26 (10%) | 22 (9%)  | 42 (16%)      | 257   | 0.003     |
| <b>Marital status</b>  |           |           |           |          |          |               |       |           |
| Married/co-hab         | 83 (30%)  | 50 (18%)  | 63 (23%)  | 21 (8%)  | 21 (8%)  | 40 (14%)      | 278   |           |
| Single                 | 57 (23%)  | 72 (28%)  | 53 (21%)  | 28 (11%) | 22 (9%)  | 21 (8%)       | 253   | 0.009     |
| <b>Entry route</b>     |           |           |           |          |          |               |       |           |
| DEM                    | 75 (23%)  | 85 (27%)  | 82 (26%)  | 33 (10%) | 23 (7%)  | 22 (7%)       | 320   |           |
| GEM                    | 16 (16%)  | 22 (22%)  | 26 (26%)  | 13 (13%) | 14 (14%) | 8 (8%)        | 99    |           |
| Not applicable         | 39 (42%)  | 10 (11%)  | 11 (12%)  | 4 (4%)   | 6 (6%)   | 23 (25%)      | 93    | <0.001    |
| <b>Training status</b> |           |           |           |          |          |               |       |           |
| Non -Trainee           | 72 (42%)  | 30 (18%)  | 12 (7%)   | 12 (7%)  | 17 (10%) | 28 (16%)      | 171   |           |
| Trainee                | 82 (20%)  | 101 (25%) | 113 (28%) | 42 (10%) | 27 (7%)  | 36 (9%)       | 401   | <0.001    |
| <b>Training level</b>  |           |           |           |          |          |               |       |           |
| BST                    | 24 (16%)  | 46 (30%)  | 32 (21%)  | 19 (12%) | 17 (11%) | 15 (10%)      | 153   |           |
| HST                    | 46 (28%)  | 27 (16%)  | 56 (34%)  | 18 (11%) | 4 (2%)   | 13 (8%)       | 164   |           |
| Run through            | 12 (14%)  | 28 (33%)  | 25 (30%)  | 5 (6%)   | 6 (7%)   | 8 (10%)       | 84    | <0.001    |
| <b>Specialty</b>       |           |           |           |          |          |               |       |           |
| GP                     | 1 (4%)    | 7 (26%)   | 16 (59%)  | 0 (0%)   | 2 (7%)   | 1 (4%)        | 27    |           |
| Surgery                | 39 (28%)  | 33 (24%)  | 16 (12%)  | 16 (12%) | 12 (9%)  | 21 (15%)      | 137   |           |
| Medicine               | 80 (28%)  | 59 (21%)  | 70 (25%)  | 29 (10%) | 20 (7%)  | 24 (9%)       | 282   |           |
| Anaesthesia            | 26 (34%)  | 24 (31%)  | 7 (9%)    | 4 (5%)   | 7 (9%)   | 9 (12%)       | 77    |           |
| Psychiatry             | 8 (17%)   | 8 (17%)   | 16 (33%)  | 4 (8%)   | 3 (6%)   | 9 (19%)       | 48    | <0.001**  |

Abbreviations: DEM, direct entry medicine; GEM, graduate entry medicine; BST, Basic Specialist Training; HST, Higher Specialist Training; EU, European Union; GP, general practitioner.

\* The P values here represent the probability of the observed data given the assumption of independence of career intentions and demographic variables.

\*\* Fisher exact test used as chi-square approximation is not appropriate.

**Table S3.** Associations of training and working experiences with migration plans: Remain versus Leave

| <b>Training and working experiences</b> | <b>Better<br/>No. (%)</b> | <b>Worse<br/>No. (%)</b> | <b>New to post<br/>No. (%)</b> | <b>Same<br/>No. (%)</b> | <b>TOTAL<br/>No. (100%)</b> | <b>P value</b> |
|-----------------------------------------|---------------------------|--------------------------|--------------------------------|-------------------------|-----------------------------|----------------|
| <b>1. Training costs</b>                |                           |                          |                                |                         |                             |                |
| Remain Ireland                          | 49 (10)                   | 200 (39)                 | 92 (18)                        | 167 (33)                | 508                         |                |
| Leave Ireland                           | 28 (5)                    | 272 (47)                 | 73 (13)                        | 203 (35)                | 576                         | <0.001         |
| <b>2. Protected training</b>            |                           |                          |                                |                         |                             |                |
| Remain Ireland                          | 118 (23)                  | 145(28)                  | 77(15)                         | 169(33)                 | 509                         |                |
| Leave Ireland                           | 97 (17)                   | 206(36)                  | 57(10)                         | 216(38)                 | 576                         | <0.001         |
| <b>3. Supervision</b>                   |                           |                          |                                |                         |                             |                |
| Remain Ireland                          | 161 (32)                  | 90 (18)                  | 73 (14)                        | 184 (36)                | 508                         |                |
| Leave Ireland                           | 130 (23)                  | 118 (20)                 | 61 (11)                        | 268 (46)                | 577                         | <0.001         |
| <b>4. Mentoring supports</b>            |                           |                          |                                |                         |                             |                |
| Remain Ireland                          | 168 (33)                  | 86 (17)                  | 84 (17)                        | 171 (34)                | 509                         |                |
| Leave Ireland                           | 152 (26)                  | 126 (22)                 | 65 (11)                        | 234 (41)                | 577                         | <0.001         |
| <b>5. Non-core tasks</b>                |                           |                          |                                |                         |                             |                |
| Remain Ireland                          | 107 (21)                  | 137 (27)                 | 54 (11)                        | 213 (42)                | 511                         |                |
| Leave Ireland                           | 109 (19)                  | 167 (29)                 | 44 (8)                         | 252 (44)                | 572                         | 0.28           |
| <b>6. Stress levels</b>                 |                           |                          |                                |                         |                             |                |
| Remain Ireland                          | 100 (20)                  | 205 (40)                 | 42 (8)                         | 161 (32)                | 508                         |                |
| Leave Ireland                           | 75 (13)                   | 287 (50)                 | 32 (6)                         | 182 (32)                | 576                         | 0.001          |
| <b>7. Bullying</b>                      |                           |                          |                                |                         |                             |                |
| Remain Ireland                          | 126 (25)                  | 81 (16)                  | 63 (12)                        | 238 (47)                | 508                         |                |
| Leave Ireland                           | 111 (19)                  | 124 (22)                 | 51 (9)                         | 290 (50)                | 576                         | 0.007          |
| <b>8. Staffing levels</b>               |                           |                          |                                |                         |                             |                |
| Remain Ireland                          | 93 (18)                   | 208 (41)                 | 41 (8)                         | 167 (33)                | 509                         |                |
| Leave Ireland                           | 72 (12)                   | 283 (49)                 | 38 (7)                         | 183 (32)                | 576                         | 0.01           |

\* totals for each row = 100%

**Table S4.** Associations of training and working experiences with migration plans: Go but Return Versus Go and Not Return

| <b>Migration level 1</b>     | <b>Better<br/>No. (%)</b> | <b>Worse<br/>No. (%)</b> | <b>New to<br/>post<br/>No. (%)</b> | <b>Same<br/>No. (%)</b> | <b>TOTAL<br/>No. (100%)</b> | <b>P value</b> |
|------------------------------|---------------------------|--------------------------|------------------------------------|-------------------------|-----------------------------|----------------|
| <b>1. Training costs</b>     |                           |                          |                                    |                         |                             |                |
| Go but Return                | 18 (5)                    | 175 (45)                 | 55 (14)                            | 140 (36)                | 388                         | 0.31           |
| Go Not Return                | 10 (5)                    | 97 (52)                  | 18 (10)                            | 63 (34)                 | 188                         |                |
| <b>2. Protected training</b> |                           |                          |                                    |                         |                             |                |
| Go but Return                | 74(19)                    | 116(30)                  | 42(11)                             | 156(40)                 | 407                         | <0.001         |
| Go Not Return                | 3(12)                     | 90(48)                   | 15(8)                              | 60(32)                  | 191                         |                |
| <b>3. Supervision</b>        |                           |                          |                                    |                         |                             |                |
| Go but Return                | 90 (23)                   | 57 (15)                  | 47 (12)                            | 194 (50)                | 388                         | <0.001         |
| Go Not Return                | 40 (21)                   | 61 (32)                  | 14 (7)                             | 74 (39)                 | 189                         |                |
| <b>4. Mentoring supports</b> |                           |                          |                                    |                         |                             |                |
| Go but Return                | 114 (29)                  | 51 (13)                  | 49 (13)                            | 174 (45)                | 388                         | <0.001         |
| Go Not Return                | 38 (20)                   | 75 (40)                  | 16 (8)                             | 60 (32)                 | 189                         |                |
| <b>5. Non-core tasks</b>     |                           |                          |                                    |                         |                             |                |
| Go but Return                | 84 (22)                   | 97 (25)                  | 33 (9)                             | 172 (45)                | 386                         | 0.006          |
| Go Not Return                | 25 (13)                   | 70 (38)                  | 11 (6)                             | 80 (43)                 | 186                         |                |
| <b>6. Stress levels</b>      |                           |                          |                                    |                         |                             |                |
| Go but Return                | 59 (15)                   | 169 (44)                 | 25 (6)                             | 134 (35)                | 387                         | <0.001         |
| Go Not Return                | 16 (8)                    | 118 (62)                 | 7 (4)                              | 48 (25)                 | 189                         |                |
| <b>7. Bullying</b>           |                           |                          |                                    |                         |                             |                |
| Go but Return                | 81 (21)                   | 64 (17)                  | 38 (10)                            | 204 (53)                | 387                         | <0.001         |
| Go Not Return                | 30 (16)                   | 60 (32)                  | 13 (7)                             | 86 (46)                 | 189                         |                |
| <b>8. Staffing levels</b>    |                           |                          |                                    |                         |                             |                |
| Go but Return                | 49 (13)                   | 184 (48)                 | 28 (7)                             | 126 (33)                | 387                         | 0.66           |
| Go Not Return                | 23 (12)                   | 99 (52)                  | 10 (5)                             | 57 (30)                 | 189                         |                |

**Table S5.** Multivariable model odds ratios for ‘leave’ (quit) versus ‘continue’ in medicine’

| <b>Variable</b>                       | <b>Odds ratio</b> | <b>Confidence<br/>2.5%</b> | <b>Intervals<br/>97.5%</b> | <b>P value</b> |
|---------------------------------------|-------------------|----------------------------|----------------------------|----------------|
| Baseline                              | 1.08              | 0.04                       | 29.5                       | = 0.965        |
| Age > 30 years                        | 0.88              | 0.79                       | 0.97                       | = 0.014        |
| <b>Relationship Status:</b><br>Single |                   |                            |                            |                |
| Married/ Co-habiting                  | 2.98              | 1.3                        | 8.82                       | = 0.01         |
| <b>Mentoring:</b><br>Remains the same |                   |                            |                            |                |
| New to post                           | 0.65              | 0.13                       | 3.16                       | = 0.596        |
| Has become worse                      | 4.55              | 1.92                       | 10.74                      | = 0.001        |
| Is better                             | 0.61              | 0.18                       | 2.06                       | = 0.429        |

*Footnote: The baseline reference individual is a 30 years or younger doctor who is single and who reported the quality of mentoring as having stayed the same.*
